# Supplementary material
Source: PubMed Central journal article supplement (PMC3954701)

## **Supplementary appendix**

This appendix formed part of the original submission and has been peer reviewed. We post it as supplied by the authors.

Supplement to: Rajan A, Carter CA, Berman A, et al. Cixutumumab for patients with recurrent or refractory advanced thymic epithelial tumours: a multicentre, open-label, phase 2 trial. *Lancet Oncol* 2014; published online January 15. [http://dx.doi.org/10.1016/S1470-2045\(13\)70596-5](http://dx.doi.org/10.1016/S1470-2045(13)70596-5).

## **Supplementary appendix**

**Supplement to: Rajan A, Carter CA, Berman A, et al. Cixutumumab for patients with recurrent or refractory, advanced thymic epithelial tumors: a multicentre, open-label, phase 2 trial**

## **Additional methods**

### **Patients**

Adequate organ and bone marrow function was defined as: leucocytes  $>3 \times 10^9$  cells per L, absolute neutrophil count  $>1.5 \times 10^9$  cells per L, haemoglobin  $>90$  g/L, platelets  $>100 \times 10^9$  cells per L, total bilirubin  $\leq 1.5$  times institutional upper limit of normal (ULN), aspartate aminotransferase or alanine aminotransferase  $<3$  times institutional ULN (5 times if liver function test elevations are due to liver metastases), and creatinine  $\leq 1.5$  times institutional ULN (or creatinine clearance  $>1$  mL per  $\text{s/m}^2$  for patients with creatinine levels above institutional normal).

Patients with symptomatic brain metastases, fasting blood glucose  $\geq 6.7$  mmol/L or above the institutional ULN, major surgery, radiation therapy, chemotherapy, biological therapy, or hormonal therapy within 4 weeks of enrolling, and unresolved residual toxic effects related to previous treatment were ineligible for this study. Concurrent steroids for myasthenia gravis or other thymic epithelial tumour-related paraneoplastic conditions were permitted provided the dose was stable for  $\geq 8$  weeks prior to enrolment.

### **Procedures**

Baseline evaluation consisted of a complete history and physical examination, tumour imaging with a CT scan of the chest, abdomen and pelvis and PET scan, and laboratory assessment including a complete blood count, prothrombin time, partial thromboplastin time, serum chemistries, lipid profile, amylase, lipase, HbA1c, IGF-1 levels, quantitative immunoglobulin assessment, urinalysis, and electrocardiogram.

Although pharmacokinetic analysis was proposed initially, it was not done after completion of the study since pharmacokinetic data were available for every 3-week dosing of cixutumumab by the time enrolment was completed to this trial.

### **Pharmacodynamic analysis**

For multiparameter flow cytometric analysis, mononuclear cells were obtained by centrifugation and the cells were viably frozen until analysis. For assessment of interferon  $\gamma$  expression in CD4+ T cells, mononuclear cells were incubated with phorbol myristate acetate, ionomycin, and monensin for 4 h, stained for CD4 and interferon  $\gamma$ , and analysed in a MACSQuant flow cytometer (Miltenyi Biotec, Bergisch Gladbach, Germany). Peripheral blood populations were defined as central memory CD4 T cells (CD4+ CCR7+, CD27+, CD45RA-), naive CD4 T cells (CD4+ CCR7+, CD27+, CD45RA+), regulatory T cells (Tregs; CD4+CD25hiFoxp3+), and analysed in an LSR II (BD Biosciences). Circulating endothelial cells (CECs; CD45-, CD31+, CD146+ CD133-) and circulating endothelial progenitor cells (CEPs; CD45-, CD31+, CD146- CD133+) were analysed in a MACSQuant flow cytometer. All flow cytometric data were analysed using FlowJo software (Tree Star, Ashland, OR, USA).

### **Statistical analysis**

The association between a variety of clinical and laboratory parameters and response and survival was determined using the Kaplan-Meier method and a log-rank test. As a total of 44 survival analyses were performed, p values for these analyses need to be interpreted in that context. For parameters obtained at multiple timepoints, the association with survival according to values at cycle 1, day 1 (CID1), cycle 2, day 1 (C2D1), and the difference between the two timepoints were all evaluated. Paired differences in total and free IGF-1, and in IGF-1R, between baseline and values at later timepoints were evaluated for significance using a Wilcoxon signed rank test.

Separately by histology, responses were divided into three categories as partial response, stable disease, and progressive disease, or into two response groups: partial response and no response. A Jonckheere-Terpstra test for trend was used to assess the significance of the trends in the changes in CEPs and CECs over the three response categories, whereas a Wilcoxon rank sum test was used to compare the changes in CEPs and CECs when only two response groups were compared.

All p values are two-tailed and presented without any adjustment for multiple comparisons.

|                   | <b>Ethnic origin</b> | <b>WHO subtype</b> | <b>Cycles (n)</b> | <b>New or worsening* autoimmune disease during treatment</b> | <b>Previous regimens of systemic treatment (n)</b> | <b>Previous radiation therapy</b> | <b>Previous surgery</b> | <b>Presence of extra-thoracic metastases</b> | <b>Time to response (months)</b> |
|-------------------|----------------------|--------------------|-------------------|--------------------------------------------------------------|----------------------------------------------------|-----------------------------------|-------------------------|----------------------------------------------|----------------------------------|
| 57-year-old man   | White                | B3                 | 46                | No                                                           | 3                                                  | Yes                               | Yes                     | No                                           | 19.5                             |
| 52-year-old man   | White                | B2                 | 18                | No                                                           | 4                                                  | No                                | Yes                     | Yes                                          | 8.5                              |
| 39-year-old woman | White                | B1                 | 6                 | Yes                                                          | 3                                                  | Yes                               | No                      | Yes                                          | 3                                |
| 42-year-old man   | Black                | AB                 | 24                | Yes                                                          | 2                                                  | No                                | Yes                     | No                                           | 4.5                              |
| 59-year-old woman | White                | B2                 | 15                | Yes                                                          | 2                                                  | No                                | Yes                     | No                                           | 7.5                              |

\*Details of worsening autoimmune disease during treatment are provided in table 4.

***Supplemental Table 1: Details of partial responders***

|                               | <b>Response or disease stabilisation</b> | <b>Duration of response or disease stabilisation (months)</b> |
|-------------------------------|------------------------------------------|---------------------------------------------------------------|
| <b>Patient description</b>    |                                          |                                                               |
| 57-year-old man, B3 subtype   |                                          |                                                               |
| PAC                           | No                                       | NA                                                            |
| Ifosfamide                    | Yes                                      | 4                                                             |
| Belinostat*                   | Yes                                      | 11                                                            |
| 52-year-old man, B2 subtype   |                                          |                                                               |
| Saracatinib*                  | No                                       | NA                                                            |
| Belinostat*                   | No                                       | NA                                                            |
| Paclitaxel                    | Yes                                      | 4                                                             |
| 39-year-old woman, B1 subtype |                                          |                                                               |
| ADOC                          | Yes                                      | 35                                                            |
| Pemetrexed                    | Yes                                      | 9                                                             |
| Pemetrexed                    | Yes                                      | 7                                                             |
| 42-year-old man, AB subtype   |                                          |                                                               |
| Pemetrexed                    | Yes                                      | 23                                                            |
| 59-year-old woman, B2 subtype |                                          |                                                               |
| ADOC                          | Yes                                      | 16                                                            |
| Carboplatin plus paclitaxel   | Yes                                      | 4                                                             |

NA=not applicable; PAC=cisplatin, doxorubicin, cyclophosphamide. ADOC=cisplatin, doxorubicin, cyclophosphamide, vincristine. \*Clinical trial.

**Supplemental Table 2: Previous systemic treatment for recurrent disease in patients responding to cixutumumab**

|                                      | <b>Patients (n)</b> | <b>Median (IQR) concentration</b> | <b>p (paired)*</b> |
|--------------------------------------|---------------------|-----------------------------------|--------------------|
| <b>Free IGF-1 in serum (nmol/L)</b>  |                     |                                   |                    |
| Baseline, day 1                      | 24                  | 0.1 (0.02–0.11)                   | NA                 |
| Cycle 1, day 3                       | 23                  | 0.3 (0.22–0.41)                   | <0.0001            |
| Cycle 1, day 7                       | 22                  | 0.5 (0.32–0.63)                   | <0.0001            |
| Cycle 1, day 14                      | 21                  | 0.4 (0.25–0.57)                   | <0.0001            |
| <b>Total IGF-1 in serum (nmol/L)</b> |                     |                                   |                    |
| Baseline, day 1                      | 24                  | 7.4 (2.3–13.0)                    | NA                 |
| Cycle 1, day 3                       | 23                  | 13.0 (6.5–20.5)                   | 0.0001             |
| Cycle 1, day 7                       | 22                  | 16.1 (11.0–28.6)                  | <0.0001            |
| Cycle 1, day 14                      | 21                  | 18.3 (10.3–29.0)                  | <0.0001            |
| <b>IGF-1R in PBMC (pmol/g)</b>       |                     |                                   |                    |
| Baseline, day 1                      | 13                  | 8.1 (6.2–13.0)                    | NA                 |
| Cycle 1, day 3                       | 13                  | 6.3 (4.9–9.1)                     | 0.006              |
| Cycle 1, day 7                       | 13                  | 6.3 (3.9–8.6)                     | 0.006              |
| Cycle 2, day 1                       | 13                  | 5.0 (3.5–7.0)                     | 0.001              |

NA=not applicable. PBMC=peripheral blood mononuclear cells. \*Wilcoxon signed rank test.

**Supplemental Table 3: Concentrations of IGF-1 in serum and IGF-1R in PBMCs before and after treatment with cixutumumab**

|                 | <b>Patients (n)</b> | <b>Median (IQR) amount of phospho-AKT in PBMCs (RU)</b> | <b>p (paired)*</b> |
|-----------------|---------------------|---------------------------------------------------------|--------------------|
| Baseline, day 1 | 13                  | 8.1 (5.9–12.3)                                          | NA                 |
| Cycle 1, day 3  | 13                  | 7.0 (6.3–10.4)                                          | 0.69               |
| Cycle 1, day 7  | 13                  | 8.4 (6.1–13.4)                                          | 0.60               |
| Cycle 2, day 1  | 13                  | 8.3 (5.9–14.1)                                          | 0.61               |

NA=not applicable. PBMCs=peripheral blood mononuclear cells. RU=relative unit. \*Student's *t* test.

**Supplemental Table 4: Concentrations of phospho-AKT, normalised against total protein in PBMCs before and after treatment with cixutumumab**

|                                              | <b>Timepoint</b> | <b>Samples analysed (n)</b> | <b>Median (range) value</b> | <b>p</b> |
|----------------------------------------------|------------------|-----------------------------|-----------------------------|----------|
| Interferon $\gamma$ -expressing CD4+ T cells | ..               | ..                          | ..                          | 0.0017   |
| Partial response                             | C2D1 to C1D1     | 5                           | 1.31 (0.32 to 2.04)         | ..       |
| Stable disease                               | C2D1 to C1D1     | 31                          | 1.11 (0.42 to 2.21)         | ..       |
| Progressive disease                          | C2D1 to C1D1     | 11                          | 0.93 (0.48 to 1.16)         | ..       |
| Circulating endothelial progenitors          | ..               | ..                          | ..                          | 0.049    |
| Responders (thymoma)                         | C2D1 to C1D1     | 5                           | -8.13 (-30.97 to 119.28)    | ..       |
| Non-responders (thymoma)                     | C2D1 to C1D1     | 31                          | -63.29 (-1604.22 to 259.69) | ..       |
| Circulating endothelial cells                | ..               | ..                          | ..                          | 0.29     |
| Responders (thymoma)                         | C2D1 to C1D1     | 5                           | -28.11 (-180.18 to 12.73)   | ..       |
| Non-responders (thymoma)                     | C2D1 to C1D1     | 31                          | 10.91 (-533.46 to 451.20)   | ..       |
| Anti-interferon $\alpha$ antibody            | ..               | ..                          | ..                          | 0.021    |
| Responders                                   | Pretreatment     | 5                           | 609 (60.50 to 10 044)       | ..       |
| Non-responders                               | Pretreatment     | 30                          | 15 356 (7 to 22 381)        | ..       |
| Anti-interleukin 22 antibody                 | ..               | ..                          | ..                          | 0.0048   |
| Responders                                   | Pretreatment     | 5                           | 100 (32 to 309)             | ..       |
| Non-responders                               | Pretreatment     | 30                          | 516.75 (16 to 10 097)       | ..       |
| Anti-GMCSF antibody                          | ..               | ..                          | ..                          | 0.014    |
| Responders                                   | Pretreatment     | 5                           | 212.50 (43.50 to 526)       | ..       |
| Non-responders                               | Pretreatment     | 29                          | 28 (19 to 247.50)           | ..       |
| Anti-interferon $\gamma$ antibody            | ..               | ..                          | ..                          | 0.0091   |
| New or worse autoimmune condition            | Pretreatment     | 8                           | 108 (46 to 405.50)          | ..       |
| No new or worse autoimmune condition         | Pretreatment     | 38                          | 49.75 (3 to 1414)           | ..       |
| Interferon $\gamma$ -expressing CD4+ T cells | ..               | ..                          | ..                          | 0.011    |
| New or worse autoimmune condition            | Pretreatment     | 8                           | 4.80 (1.21 to 24.60)        | ..       |
| No new or worse autoimmune condition         | Pretreatment     | 39                          | 14.20 (1.40 to 48.60)       | ..       |
| Interleukin 17-expressing CD4+ T cells       | ..               | ..                          | ..                          | 0.033    |
| New or worse autoimmune condition            | Pretreatment     | 8                           | 0.14 (0.06 to 1.15)         | ..       |
| No new or worse autoimmune condition         | Pretreatment     | 39                          | 0.46 (0.04 to 2.51)         | ..       |
| Interleukin 4-expressing CD4+ T cells        | ..               | ..                          | ..                          | 0.021    |
| New or worse autoimmune condition            | Pretreatment     | 8                           | 0.55 (0.18 to 2.61)         | ..       |
| No new or worse autoimmune condition         | Pretreatment     | 39                          | 2.34 (0.14 to 17.30)        | ..       |
| Interleukin 17-expressing CD4+ T cells       | ..               | ..                          | ..                          | 0.0058   |
| New or worse autoimmune condition            | C2D1 to C1D1     | 8                           | 0.13 (0.06 to 0.58)         | ..       |
| No new or worse autoimmune condition         | C2D1 to C1D1     | 39                          | 0.56 (0.04 to 3.13)         | ..       |



|                                              |              |    |                      |       |
|----------------------------------------------|--------------|----|----------------------|-------|
| Interferon $\gamma$ -expressing CD4+ T cells | ..           | .. | ..                   | 0.016 |
| New or worse autoimmune condition            | C2D1 to C1D1 | 8  | 4.34 (1.49 to 24.50) | ..    |
| No new or worse autoimmune condition         | C2D1 to C1D1 | 39 | 14.80 (1.62 to 54)   | ..    |
| Interleukin 4-expressing CD4+ T cells        | ..           | .. | ..                   | 0.043 |
| New or worse autoimmune condition            | C2D1 to C1D1 | 8  | 0.63 (0.23 to 4.74)  | ..    |
| No new or worse autoimmune condition         | C2D1 to C1D1 | 39 | 2.38 (0.16 to 11.50) | ..    |

C2D1=cycle 2, day 1. C1D1=cycle 1, day 1. GMCSF=granulocyte macrophage colony-stimulating factor.

**Supplemental Table 5: Results of selected immune correlative studies**

Supplemental Figure 1: Change in amounts of (A) free IGF-1 and (B) total IGF-1 after treatment with cixutumumab  
C1D1=cycle 1, day 1. C1D3=cycle 1, day 3. C1D7=cycle 1, day 7. C1D14=cycle 1, day 14.

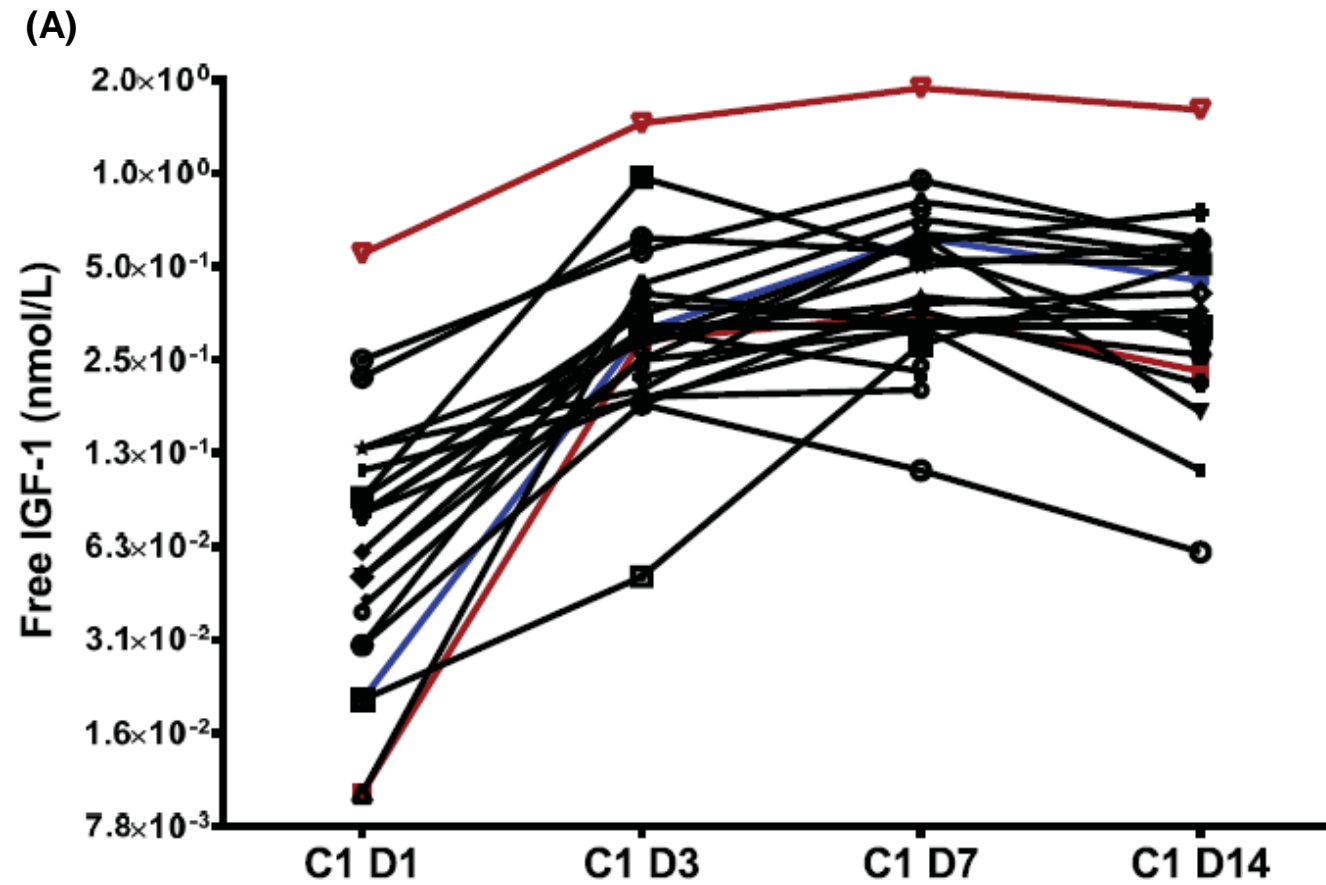

(B)

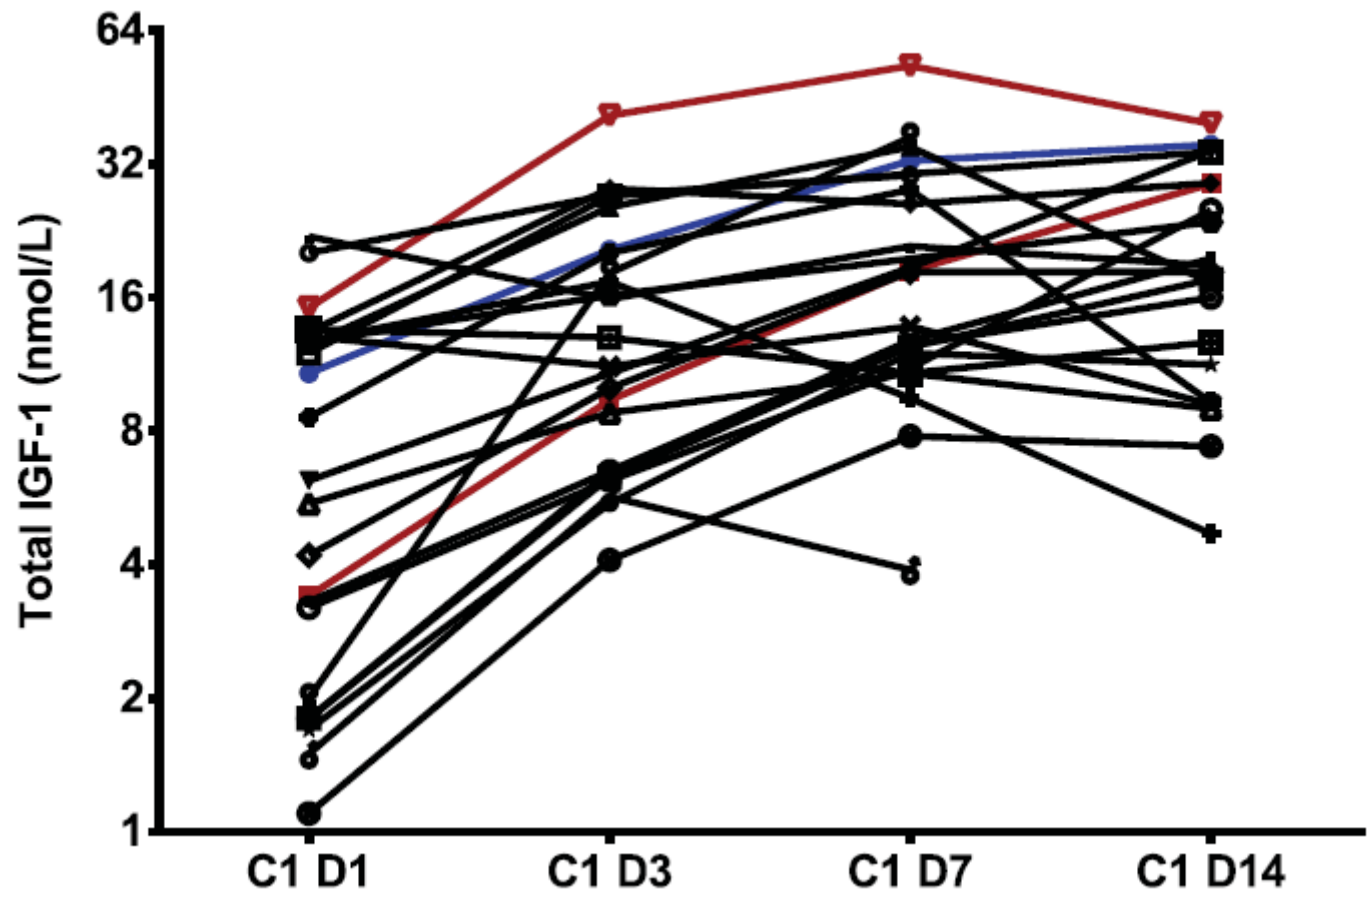

**Supplemental Figure 2 : Kaplan-Meier curves for overall survival in patients with thymoma according to amounts of (A) free IGF-1 ( $\leq 0.056$  nmol/L vs  $>0.056$  nmol/L) and (B) total IGF-1 ( $\leq 6.54$  nmol/L vs  $>6.54$  nmol/L) before treatment**

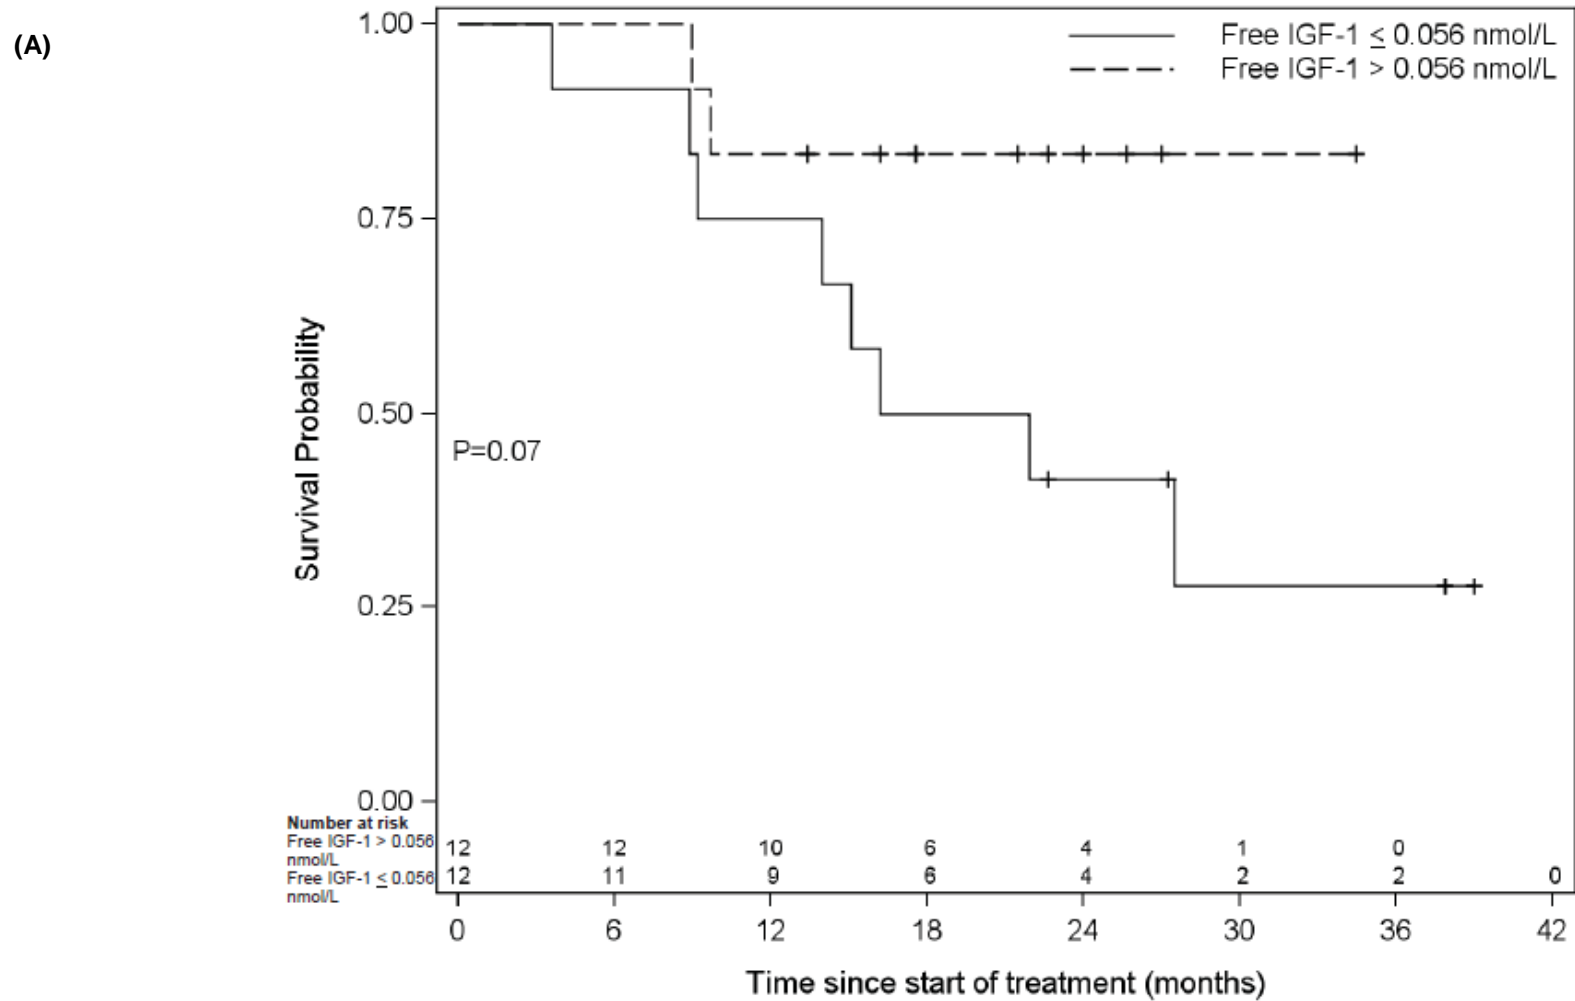

(B)

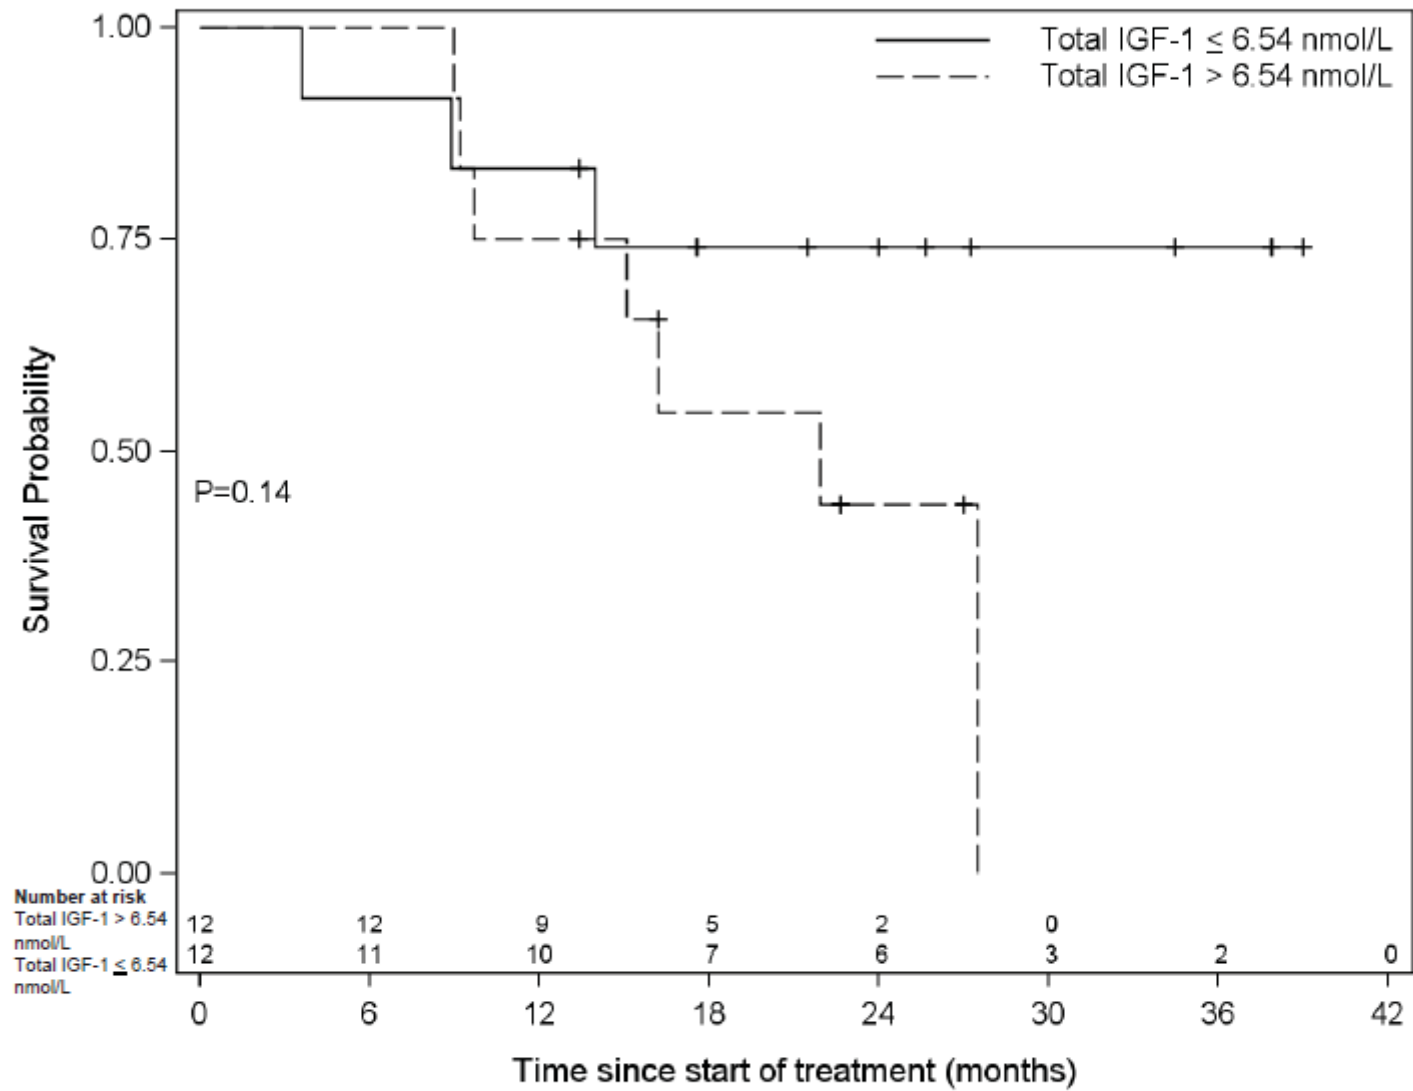

**Supplemental Figure 3: Association between amounts of IGF-1 and pre-existing or new or worsening autoimmune disease**

(A) Free IGF-1 and pre-existing autoimmune disease ( $p=0.51$ ). (B) Free IGF-1 and new or worsening autoimmune disease ( $p=0.94$ ).  
(C) Total IGF-1 and pre-existing autoimmune disease ( $p=0.68$ ). (D) Total IGF-1 and new or worsening autoimmune disease ( $p=0.82$ ).

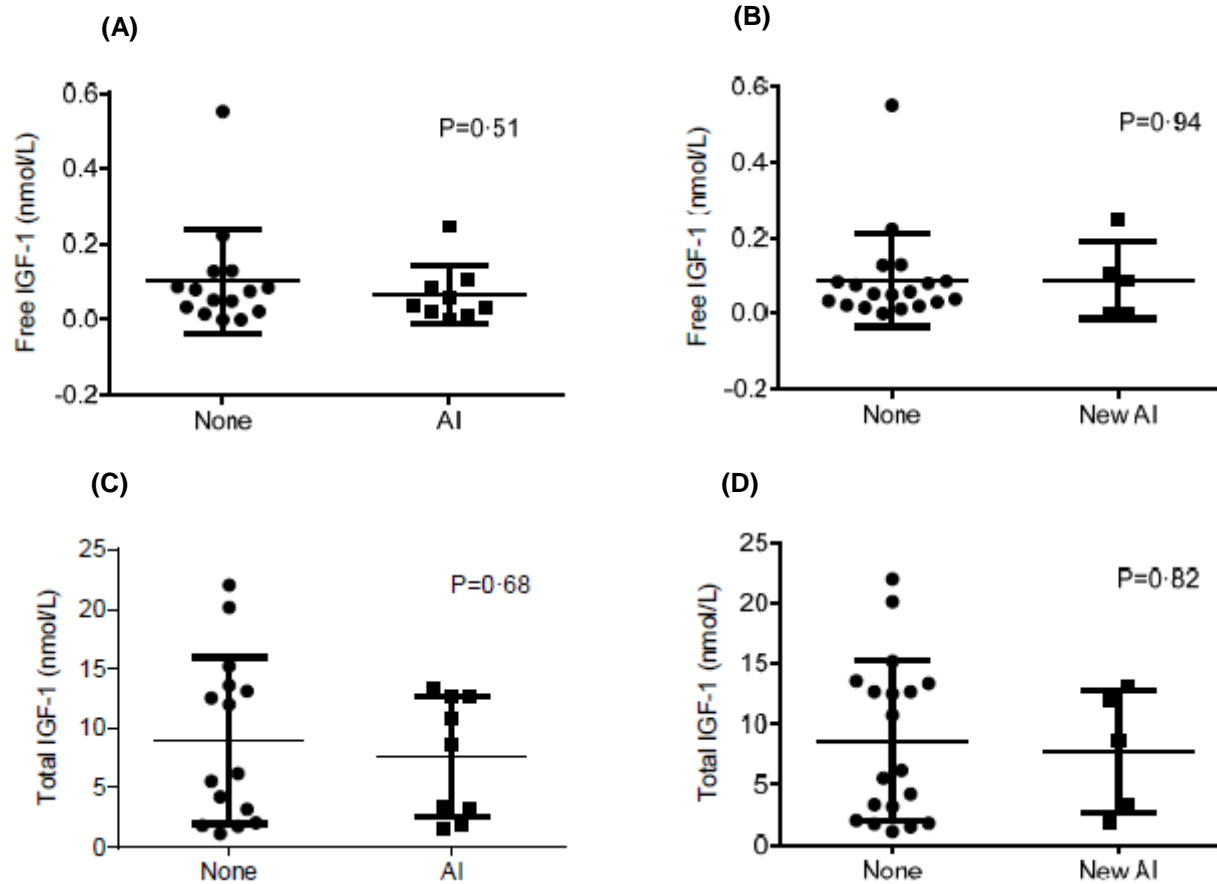

Supplement: NIHMS560871-supplement-01.pdf [file NIHMS560871-supplement-01.pdf]
